# Supplementary material for: The Use of the Cryopreserved Aortic Homograft for Aortic Valve Replacement: Is It Still an Option?
Source: MDPI journal article supplement (doi:10.3390/jcdd10060248), 2023-06-08
Supplement: s1 [file s1]

**Supplementary Table S1.** Echocardiographic parameters.

|                |                 | LVEDD               | LVESD               | LVEF                | AV<br>regurgitation<br>grade | AV mean<br>gradient | Annular<br>diameter | LVOT<br>diameter    | Aortic<br>diameter  |
|----------------|-----------------|---------------------|---------------------|---------------------|------------------------------|---------------------|---------------------|---------------------|---------------------|
| Discharge      |                 | 46.9±4.7            | 36.2±6.1            | 57.3±5.5            | 0.4±0.5                      | 9.0±0.8             | 22.4±1.9            | 21.9±1.9            | 34.1±4.1            |
| Last follow up |                 | 46.3±4.7            | 35.8±6.0            | 58.0±5.8            | 0.8±0.7                      | 9.9±2.0             | 22.5±1.7            | 21.9±1.9            | 33.9±4.9            |
| P value        |                 | <0.001*             | <0.001*             | <0.001*             | <0.001*                      | <0.001              | 0.008*              | 0.319               | 0.440               |
| Age            | < 25 years (a)  | 42.1±3.0            | 30.3±4.9            | 61.9±2.8            | 1.1±0.9                      | 11.1±3.1            | 21.1±2.2            | 30.0±2.8            | 28.6±3.8            |
|                | 25-50 years (b) | 45.3±2.9            | 35.1±5.2            | 59.6±3.6            | 0.6±0.5                      | 9.3±0.8             | 22.9±1.3            | 22.3±1.2            | 34.6±4.4            |
|                | > 50 years (c)  | 51.6±4.0            | 41.4±3.4            | 51.6±6.0            | 0.8±0.8                      | 10.1±2.2            | 22.8±1.1            | 22.3±1.0            | 36.5±1.9            |
|                | P value         |                     |                     |                     |                              |                     |                     |                     |                     |
|                | (ANOVA)         | <0.001 <sup>y</sup> | <0.001 <sup>y</sup> | <0.001 <sup>y</sup> | 0.015 <sup>y</sup>           | <0.001 <sup>y</sup> | <0.001 <sup>y</sup> | <0.001 <sup>y</sup> | <0.001 <sup>y</sup> |
|                | P value (a-b)   | <0.001              | <0.001              | <0.001              | 0.016                        | <0.001              | <0.001              | <0.001              | <0.001              |
|                | P value (a-c)   | <0.001              | <0.001              | <0.001              | 0.782                        | 0.085               | <0.001              | <0.001              | <0.001              |
|                | P value (b-c)   | <0.001              | <0.001              | <0.001              | 0.282                        | 0.103               | 1.000               | 1.000               | 0.028               |
| Technique      | Freehand        | 43.7±2.6            | 33.2±4.7            | 61.2±2.7            | 0.8±0.6                      | 9.8±1.5             | 22.7±1.5            | 22.1±1.6            | 33.0±3.1            |
|                | Miniroot        | 47.4±5.0            | 36.9±6.3            | 56.5±6.2            | 0.8±0.8                      | 9.9±2.2             | 22.4±1.7            | 21.7±2.0            | 34.3±5.2            |
|                | P value         | <0.001 <sup>y</sup> | <0.001 <sup>y</sup> | <0.001 <sup>y</sup> | 0.711 <sup>y</sup>           | 0.664 <sup>y</sup>  | 0.372 <sup>y</sup>  | 0.288 <sup>y</sup>  | 0.118 <sup>y</sup>  |
| Allograft size | > 21 mm         | 44.3±5.3            | 32.2±6.8            | 59.4±6.9            | 1.0±0.8                      | 11.1±2.7            | 20.6±1.2            | 19.8±1.8            | 31.5±4.6            |
|                | ≤ 21 mm         | 47.3±4.1            | 37.6±4.7            | 57.2±5.0            | 0.7±0.7                      | 9.2±1.1             | 23.4±0.8            | 22.9±0.6            | 35.1±4.2            |
|                | P value         | <0.001 <sup>y</sup> | <0.001 <sup>y</sup> | 0.025 <sup>y</sup>  | 0.040 <sup>y</sup>           | <0.001 <sup>y</sup> | <0.001 <sup>y</sup> | <0.001 <sup>y</sup> | <0.001 <sup>y</sup> |
| Endocarditis   | yes             | 47.7±5.1            | 37.3±6.1            | 56.1±6.6            | 0.8±0.7                      | 10.0±2.1            | 22.5±1.6            | 22.0±1.6            | 34.2±3.6            |
|                | no              | 44.7±3.7            | 34.0±5.6            | 60.1±3.6            | 0.8±0.7                      | 9.7±1.9             | 22.4±1.8            | 21.7±2.1            | 33.4±5.6            |
|                | P value         | <0.001 <sup>y</sup> | <0.001 <sup>y</sup> | <0.001 <sup>y</sup> | 0.728 <sup>y</sup>           | 0.290 <sup>y</sup>  | 0.702 <sup>y</sup>  | 0.447 <sup>y</sup>  | 0.311 <sup>y</sup>  |

Supplementary Table 1. Echocardiographic parameters. Abbreviations; AV, aortic valve; EF, ejection fraction (%) LVEDD; left ventricular end diastolic diameter (mm); LVESD, left ventricular end systolic diameter (mm). LVOT; left ventricle outflow tract; \* paired data analysis; <sup>y</sup> unpaired data analysis at last follow-up

**Supplementary Table S2.** Outcomes of women in childbearing age.

| <b>Outcomes</b>               | <b>Women in childbearing age<br/>who had children</b> | <b>Women childbearing age who<br/>did not have children</b> | <b>P value</b> |
|-------------------------------|-------------------------------------------------------|-------------------------------------------------------------|----------------|
| Number of patients            | 37                                                    | 7                                                           |                |
| Overall death                 | 17(45.9%)                                             | 5(71.4%)                                                    | 0.216          |
| Valve related cardiac death   | 4(10.8%)                                              | 0(0.0%)                                                     | 0.362          |
| Structural valve degeneration | 9(24.3%)                                              | 2(28.6%)                                                    | 0.812          |
| Reoperation                   | 10(27.0%)                                             | 2(28.6%)                                                    | 0.933          |
| MACCEs                        | 20(54.0%)                                             | 5(71.4%)                                                    | 0.395          |

  

| <b>Outcomes</b>               | <b>Women in childbearing age<br/>who delivered after surgery</b> | <b>All ages women</b> | <b>P value</b> |
|-------------------------------|------------------------------------------------------------------|-----------------------|----------------|
| Number of patients            | 37                                                               | 48                    |                |
| Valve related cardiac death   | 4(10.8%)                                                         | 7(14.6%)              | 0.607          |
| Structural valve degeneration | 9(24.3%)                                                         | 5(10.4%)              | 0.087          |
| Reoperation                   | 10(27.0%)                                                        | 9(18.7%)              | 0.364          |
| MACCEs                        | 20(54.0%)                                                        | 19(39.6%)             | 0.184          |
